# Supplementary material
Source: Springer Nature journal article supplement (https://www.springermedizin.de/resource/supplementary/13017_2014_375_MOESM2_ESM.pdf/9636054)

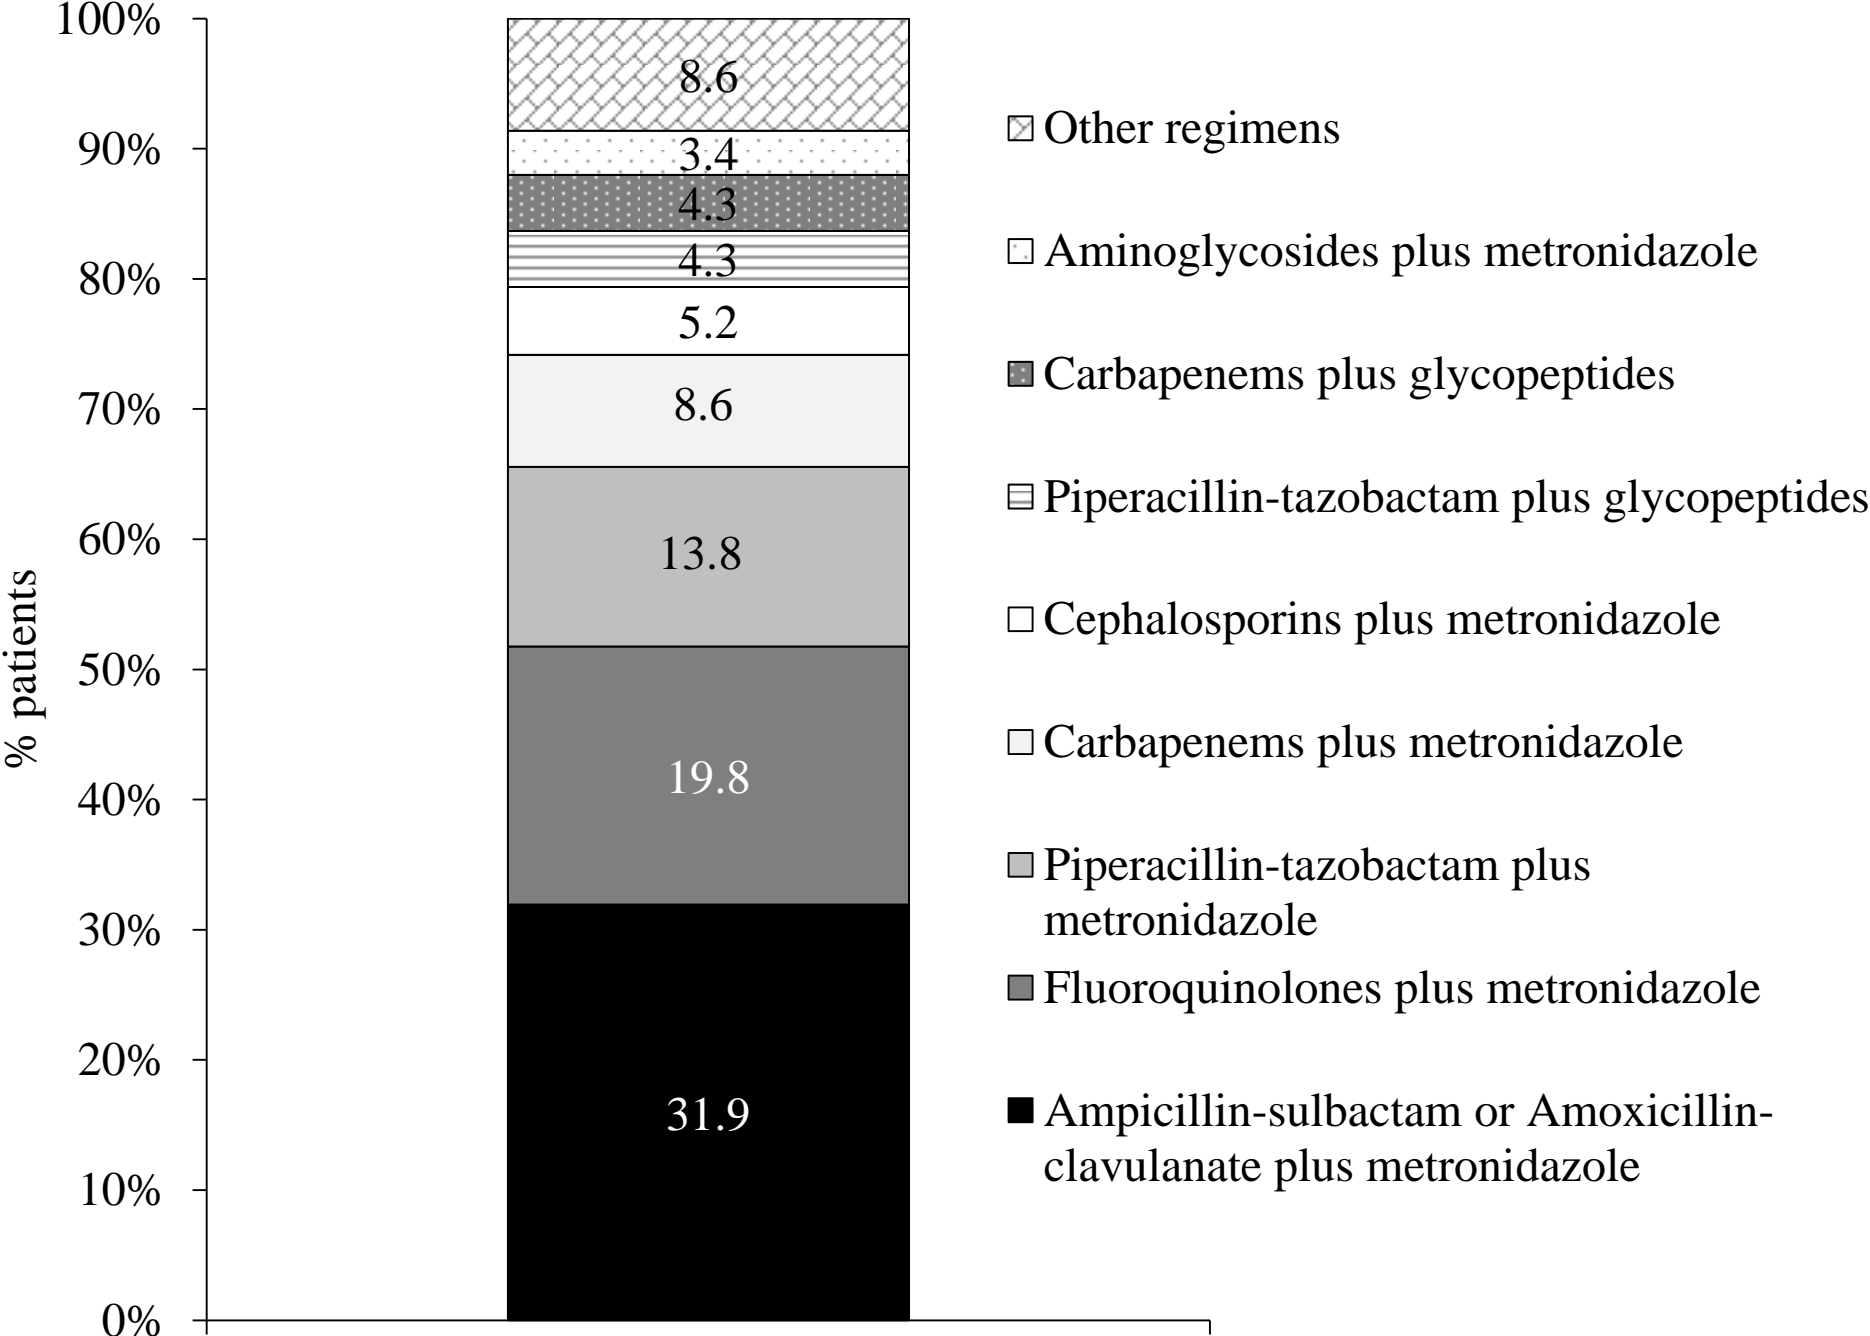

First-line antibiotic combination therapy (n = 116)

Supplement: MOESM2 [file 9636054]
